# Supplementary material for: GeO 2 /graphene nanofiber anode for low-temperature lithium-ion batteries
Source: Royal Society of Chemistry journal article supplement (doi:10.1039/d5nj00731c), 2025-01-01
Supplement: d5nj00731c1.pdf [file d5nj00731c1.pdf]

### **GeO<sub>2</sub>/graphene nanofiber anode for low temperature Lithium- ion batteries**

Bowei Cao<sup>a,b</sup>, Fenghua Zhang<sup>a</sup>, Fei Li<sup>a\*</sup> and Wei Wei<sup>b\*</sup>

<sup>a</sup>School of Petrochemical Engineering, Liaoning Shihua University, Fushun, Liaoning, P. R. China.

<sup>b</sup>School of Chemistry and Chemical Engineering, Henan Engineering Center of New Energy Battery Materials, Shangqiu Normal University, Shangqiu 476000, P. R. China.

E-mail: [weiweizzuli@163.com](mailto:weiweizzuli@163.com)

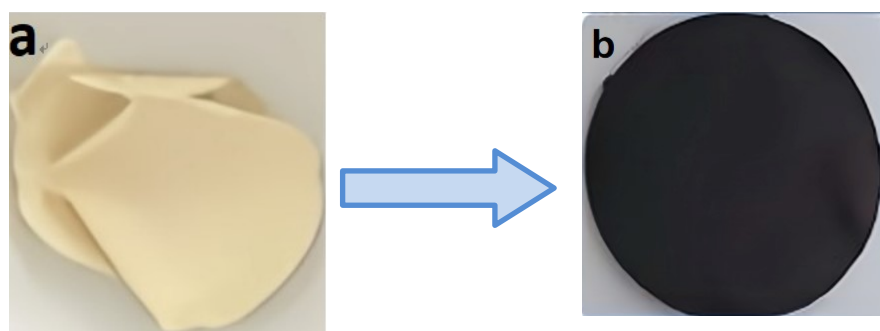

Fig. S1 The electrospinned GeO<sub>2</sub>@G NF membrane after (a) vacuum dried and (b) annealed and cutted.

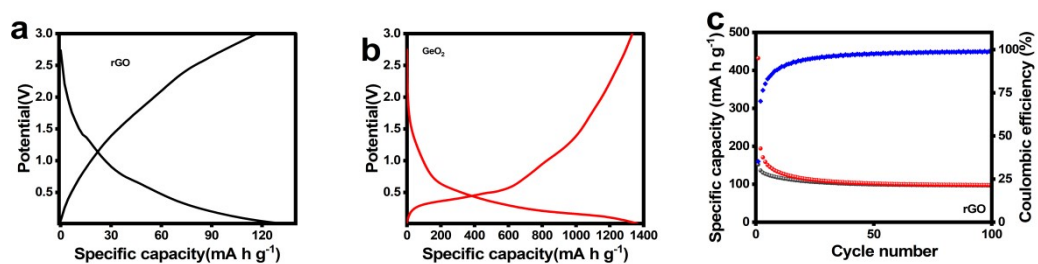

Fig. S2 The charge/discharge curves of (a) rGO and (b) amorphous GeO<sub>2</sub>, (c) cycling stability of rGO at 0.2 C.

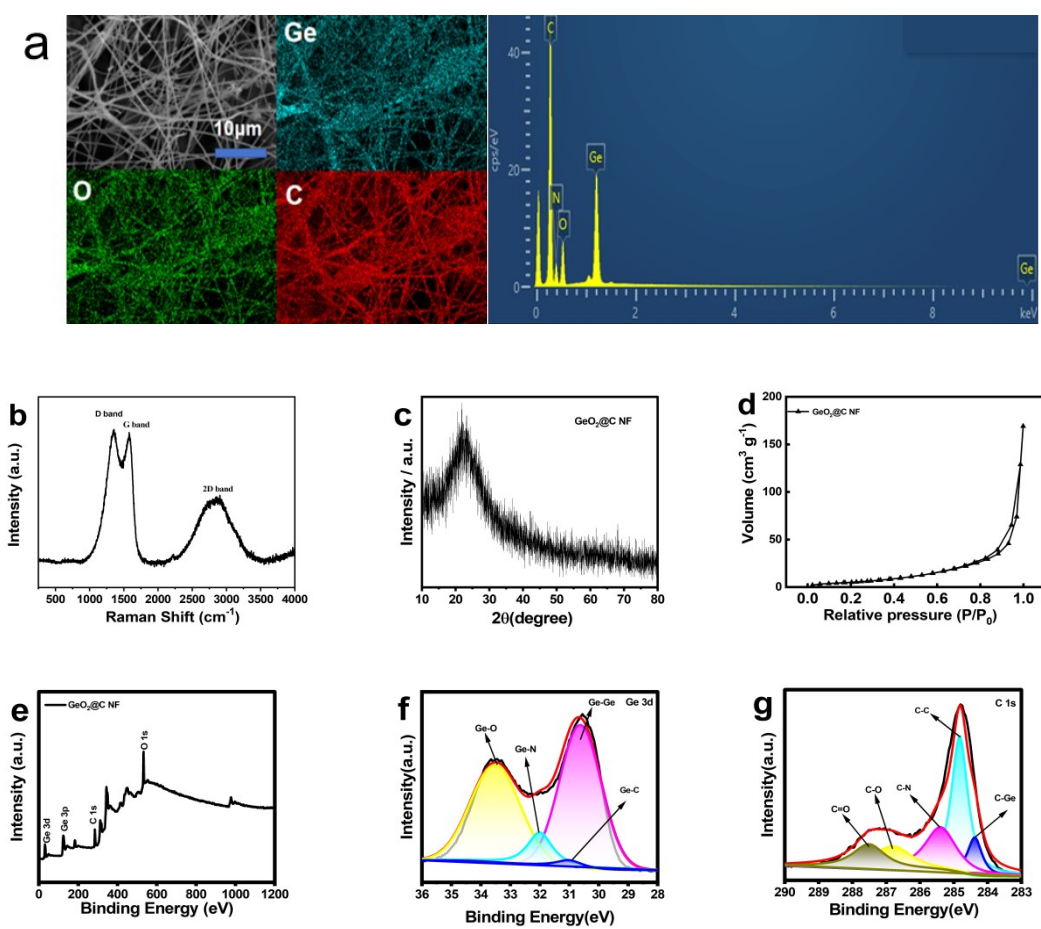

Fig.S3 The characterizations of  $\text{GeO}_2@\text{C}$  NF (a) EDS Mapping analysis, (b) Raman spectra, (c) XRD patterns, (d) BET, and (e-g) XPS spectra.

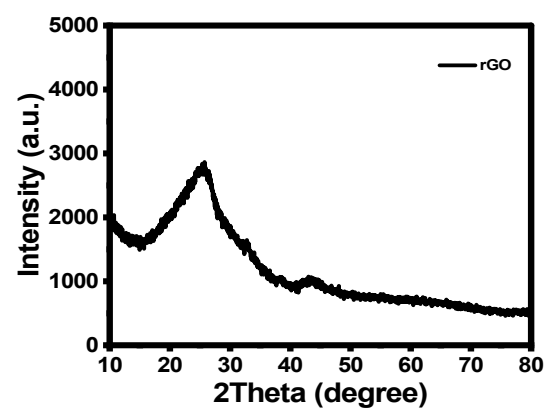

Figure S4. XRD pattern of rGO.

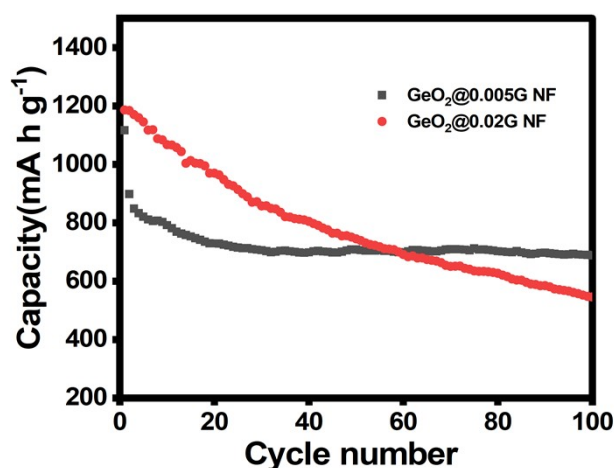

**Figure S 5.** Cycling stability of GeO<sub>2</sub>@0.005G and GeO<sub>2</sub>@0.02G NF at 0.2 C.

Two control samples were prepared. For the first sample, the amount of GO was reduced by half (0.005 g) while the other components were kept unchanged, and the sample is abbreviated as GeO<sub>2</sub>@0.005G NF. When subjected to a cycling test at a current density of 0.2 C, GeO<sub>2</sub>@0.005G NF showed slightly higher initial capacity but poorer cycling performance compared to GeO<sub>2</sub>@C NF. For the second sample, the amount of GO was doubled (0.02 g) while the other components were kept unchanged, and the sample is abbreviated as GeO<sub>2</sub>@0.02G NF. When subjected to a cycling test at a current density of 0.2 C, GeO<sub>2</sub>@0.02G NF also showed slightly higher initial capacity but poorer cycling performance compared to GeO<sub>2</sub>@C NF. Because if the proportion of graphene is too low, lacking high-toughness graphene support, the 1D structure of the sample fractures easily during Li<sup>+</sup> insertion/extraction, but overly high proportion of graphene in the sample made it difficult to form the 1D structure. Therefore, two samples failed to mitigate the volume expansion of GeO<sub>2</sub> during the charge-discharge process, resulting in decreased cycling stability.
